# Supplementary material for: Regulation of axonal regeneration by the level of function of the endogenous Nogo receptor antagonist LOTUS
Source: PubMed Central journal article supplement (PMC5608707; doi:10.1038/s41598-017-12449-6), 2017-09-21
Supplement: 41598_2017_12449_MOESM1_ESM.pdf [file 41598_2017_12449_MOESM1_ESM.pdf]

## Supplementary information

Title:

Regulation of axonal regeneration by the level of function of the endogenous Nogo receptor antagonist LOTUS

Authors:

Tomoko Hirokawa<sup>1</sup>, Yixiao Zou<sup>2</sup>, Yuji Kurihara<sup>1</sup>, Zhaoxin Jiang<sup>2</sup>, Yusuke Sakakibara<sup>3</sup>, Hiromu Ito<sup>3</sup>, Kengo Funakoshi<sup>4</sup>, Nobutaka Kawahara<sup>5,6</sup>, Yoshio Goshima<sup>3,6</sup>, Stephen M. Strittmatter<sup>2</sup>, and Kohtaro Takei<sup>1,6,\*</sup>

<sup>1</sup> Molecular Medical Bioscience Laboratory, Yokohama City University Graduate School of Medical Life Science, Yokohama 230-0045, Japan

<sup>2</sup> Cellular Neuroscience, Neurodegeneration and Repair Program, Departments of Neurology and Neuroscience, Yale University School of Medicine, New Haven, CT 06536, USA

<sup>3</sup> Department of Molecular Pharmacology and Neurobiology, Yokohama City University Graduate School of Medicine, Yokohama 246-0004, Japan

<sup>4</sup> Department of Neuroanatomy, Yokohama City University Graduate School of Medicine, Yokohama 246-0004, Japan

<sup>5</sup> Department of Neurosurgery, Yokohama City University Graduate School of Medicine, Yokohama 246-0004, Japan

<sup>6</sup> Advanced Medical Research Center, Yokohama City University Graduate School of Medicine, Yokohama 236-0004, Japan

Corresponding author:

\*Kohtaro Takei, Molecular Medical Bioscience Laboratory, Yokohama City University Graduate School of Medical Life Science, 1-7-29 Suehiro-cho, Tsurumi-ku, Yokohama

## Supplementary Fig. S1

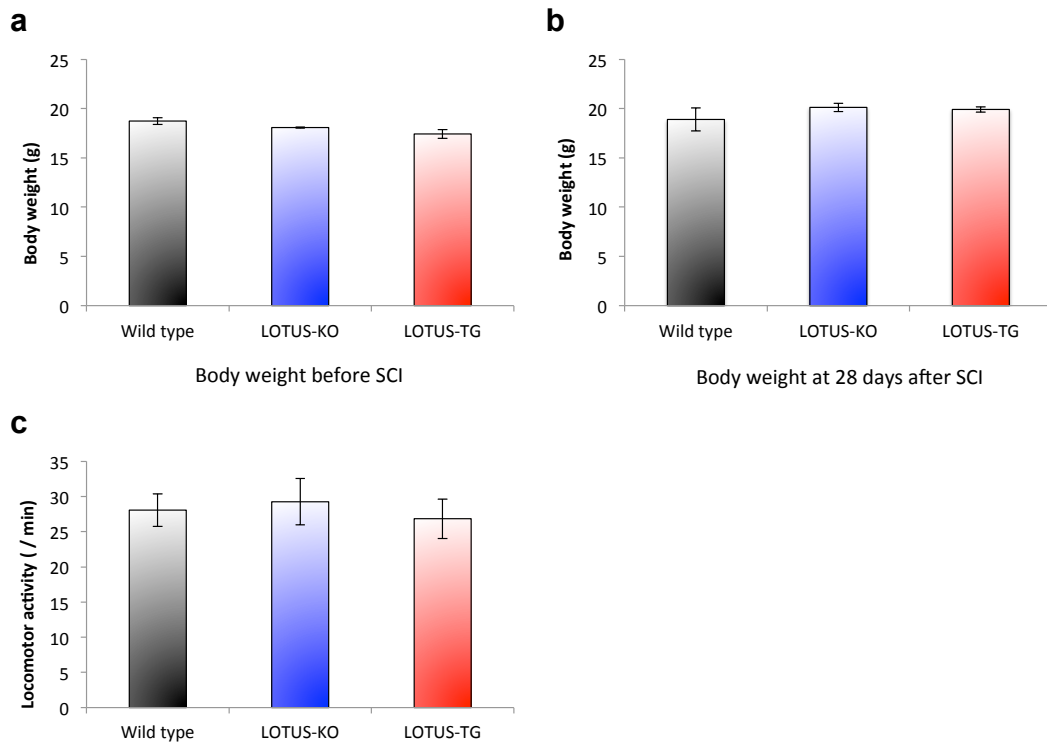

## Supplementary Figure S1

Comparison of the body weight and open field locomotor activity in WT, LOTUS-KO, and LOTUS-TG mice. **a** and **b**, Body weight of WT, LOTUS-KO, and LOTUS-TG mice 0 (**a**) and 28 days (**b**) after SCI. No significant difference was observed with one-way ANOVA and the Tukey test (WT:  $n = 5$ ; LOTUS-KO:  $n = 5$ ; LOTUS-TG:  $n = 7$ ). **c**, Open field activity was quantified by counting the number (per min) of line crossings divided into nine fractions in the field ( $35 \times 25$  cm). No significant difference was observed with one-way ANOVA and the Tukey test (WT:  $n = 13$ ; LOTUS-KO:  $n = 5$ ; LOTUS-TG:  $n = 16$ ).

## Supplementary Fig. S2

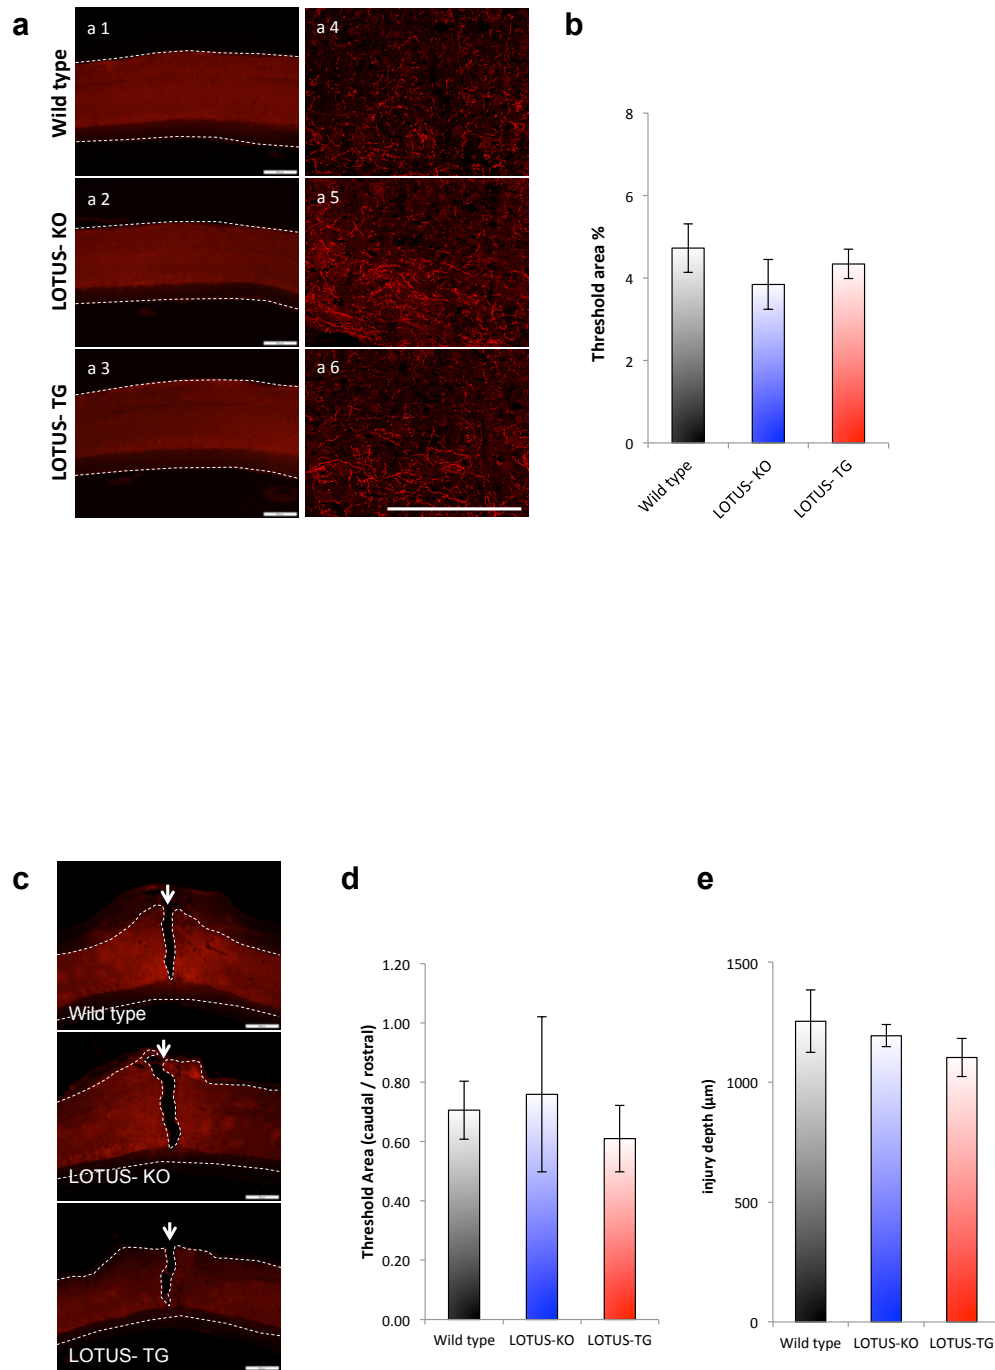

## Supplementary Figure S2

Comparison of the 5-HT immunoreactivity and depth of injury site 1 day after SCI in WT, LOTUS-KO, and LOTUS-TG mice. **(a)** Images from sagittal sections of 5-HT immunohistochemical staining revealed 5-HT-positive raphespinal tract axons in each genotype of mice before SCI. Scale bar: 500  $\mu\text{m}$  (a1- a3) and 200  $\mu\text{m}$  (a4- a6). **(b)** Quantitative analysis of 5-HT immunoreactivity. No significant difference was observed using one-way ANOVA with the Tukey test (WT: n = 3; LOTUS-KO: n = 3; LOTUS-TG: n = 3). **(c)** Images from sagittal sections of 5-HT immunohistochemical staining revealed 5-HT-positive raphespinal tract axons caudal to the injury site in each genotype of mice 1 day after SCI. The arrows indicate the injury site. Scale bar: 500  $\mu\text{m}$ . **(d)** Quantitative analysis of 5-HT immunoreactivity within 0.5 mm caudal to the injury site compared to that rostral to the injury site is shown as the relative ratio (caudal/rostral in each animal) of 5-HT immunoreactivity. No significant difference was observed using one-way ANOVA with the Tukey test (WT: n = 3; LOTUS-KO: n = 3; LOTUS-TG: n = 3). **(e)** The depth of injury site in each genotype of mice at 1 day after SCI. No significant difference was observed with one-way ANOVA and the Tukey test (WT: n = 3; LOTUS-KO: n = 2; LOTUS-TG: n = 3).

### Supplementary Fig. S3

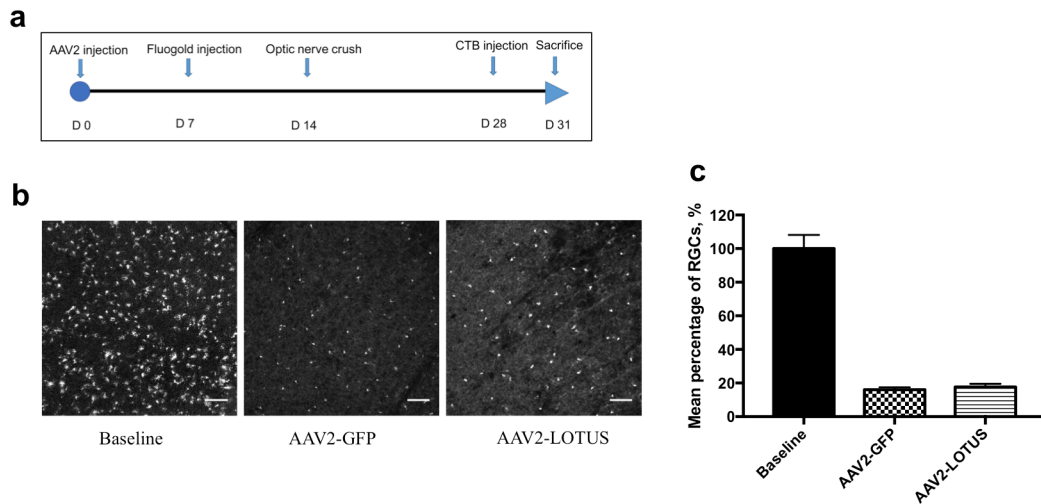

### Supplementary Figure S3

LOTUS overexpression did not affect the survival of RGCs. **(a)** Fluoro-gold (FG) was applied in the superior colliculi 7 days before the optic nerve crush. **(b)** Representative images of FG-labelled RGCs in optic nerve-crushed eyes that received AAV-GFP or AAV-LOTUS treatment (bar = 50  $\mu$ m). **(c)** The percentage of survival RGCs at 17 days post-optic nerve crush compared to baseline. An average of 17% of RGCs survived, and no significant difference was observed between the control and LOUTS overexpression groups ( $P > 0.05$ ).

## Supplementary Fig. S4

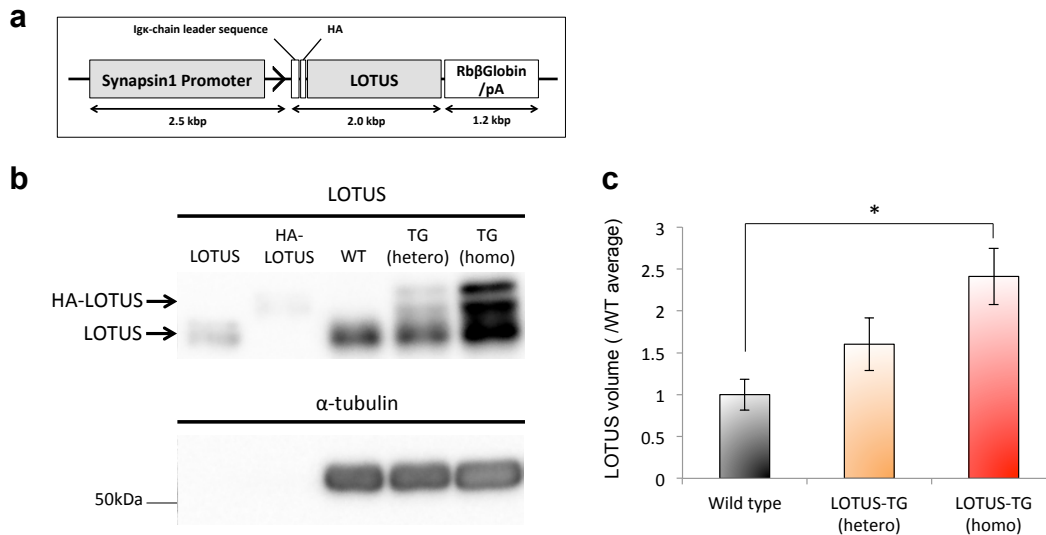

## Supplementary Figure S4

(a) Schematic drawing of the construct used to generate transgenic mice overexpressing LOTUS. HA-tagged mouse LOTUS is composed of the mouse synapsin-1 promoter, the Igk-chain leader sequence, an HA tag, mouse *lotus* cDNA (except for the signal sequence), and the rabbit β-globin intron/polyA sequence. (b) Immunoblots showing LOTUS expression in the brains of WT, LOTUS-TG (heterozygous), and LOTUS-TG (homozygous) mice. (c) The expression level of overexpressed HA-LOTUS was quantified by the intensity of protein immunoblotting and normalized to the intensity of the WT band. Significance was obtained by performing one-way ANOVA with the Tukey test (n = 4 experiments). \*p < 0.05 compared with the WT ratio.

## Supplementary Fig. S5

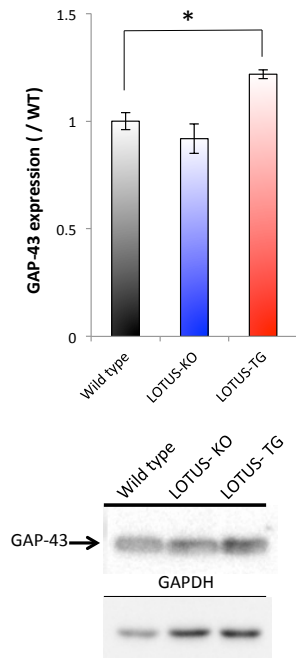

## Supplementary Figure S5

Western blot analysis of GAP-43 expression in the injured region of spinal cord after SCI. Significance was analysed by performing one-way ANOVA with the Tukey test (n = 3 experiments). \*p < 0.05 compared with the WT.
